# Supplementary material for: A super-stable Cu(i)-based polymer exhibiting thermally activated delayed fluorescence and water/acid-resistant properties
Source: Royal Society of Chemistry journal article supplement (doi:10.1039/d4tc02888k), 2024-01-01
Supplement: d4tc02888k1.pdf [file d4tc02888k1.pdf]

## Supporting Information

# Super-Stable Cu(I)-Based Polymer Exhibiting Thermally Activated Delayed Fluorescence and Water/Acid-Resistant Properties

Yue Wu,<sup>\*a</sup> Xin Zhang,<sup>a</sup> Xiao-Meng Zhen,<sup>a</sup> Yan Yang,<sup>a</sup> Bo Zhang<sup>\*a</sup> and Jun Li<sup>\*a</sup>

E-mail: ywu\_lcu@163.com

<sup>a</sup> College of Chemistry and Chemical Engineering, Shandong Provincial Key Laboratory/Collaborative Innovation Center of Chemical Energy Storage and Novel Cell Technology, Liaocheng University, Liaocheng 252059, China

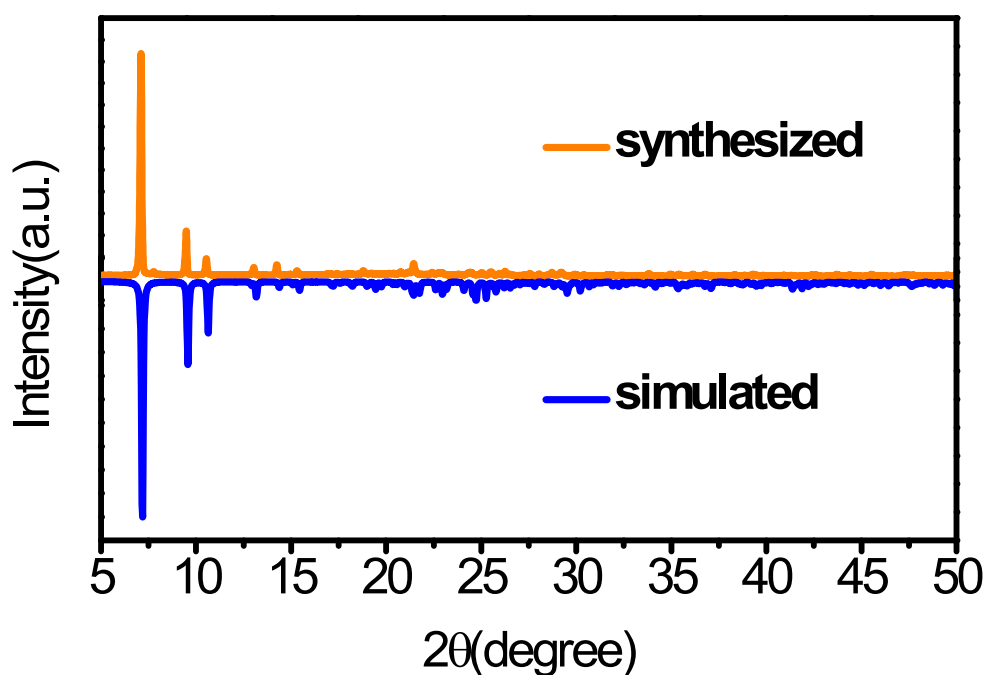

**Figure S1.** PXRD patterns of  $\text{Cu}_n\text{I}_n(\text{PNP})_{n/2}$  and corresponding simulated one from single crystal.

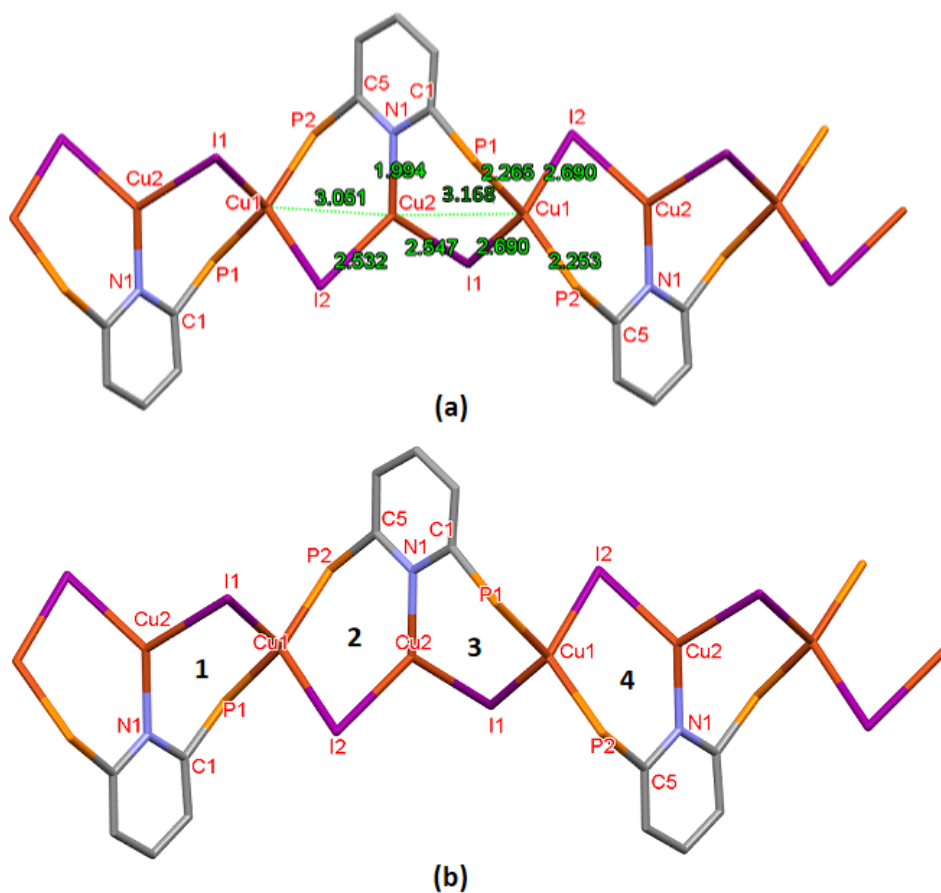

**Figure S2.** View of 1D structural diagram towards b axis of  $\text{Cu}_n\text{I}_n(\text{PNP})_{n/2}$ , showing (a)  $\text{Cu}\cdots\text{Cu}$  and  $\text{Cu-X}$  ( $\text{X}=\text{P}, \text{N}, \text{I}$ ) bond length, and (b) Six-membered ring.

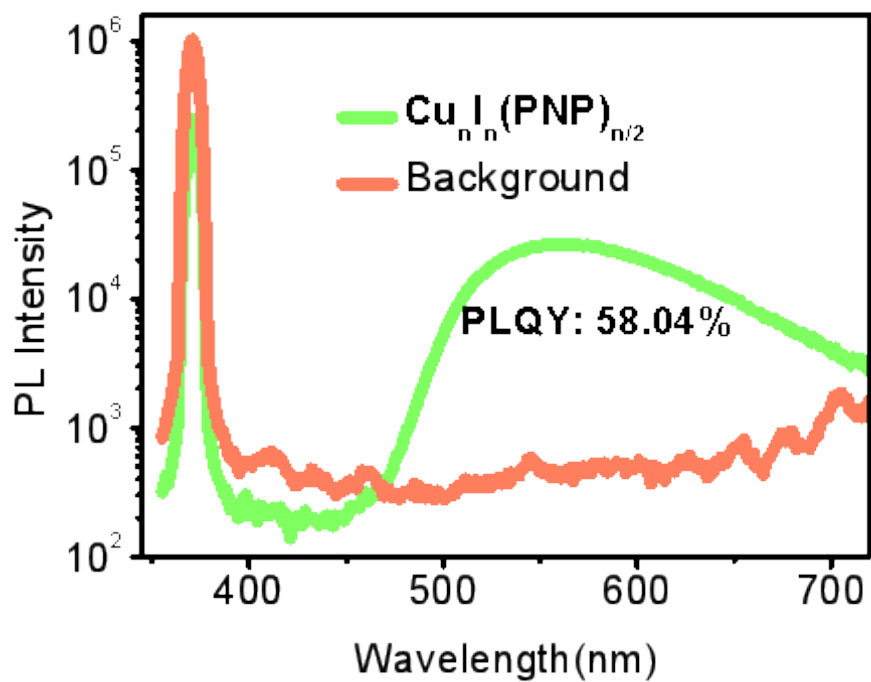

(a)

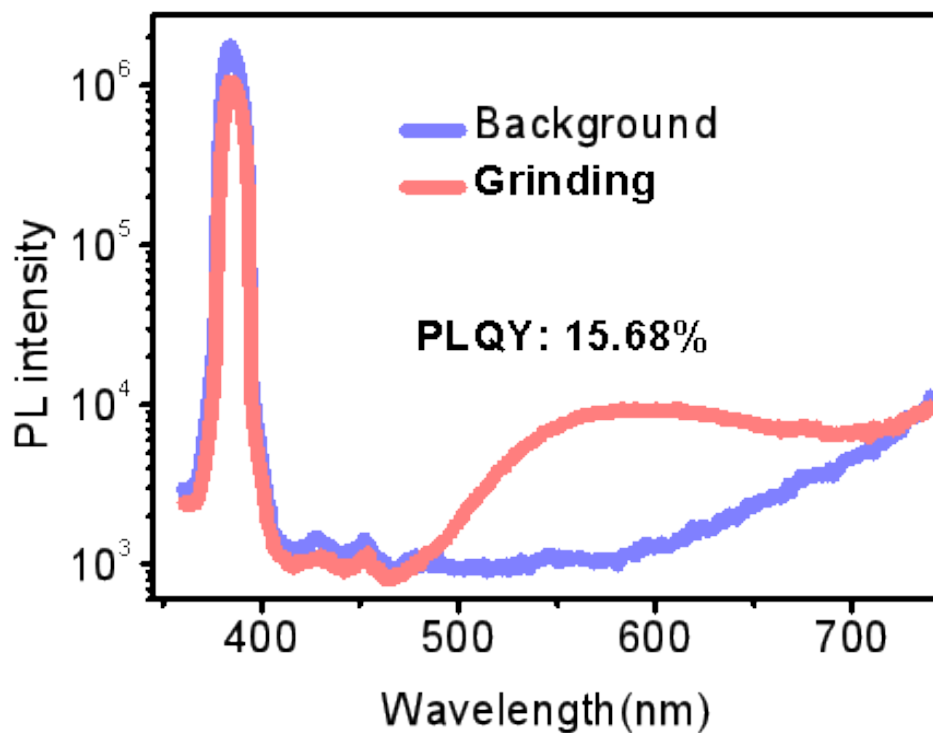

(b)

**Figure S3.** The PLQY of (a)  $\text{Cu}_n\text{I}_n(\text{PNP})_{n/2}$  crystals and (b) corresponding grinding powder of  $\text{Cu}_n\text{I}_n(\text{PNP})_{n/2}$  crystals.

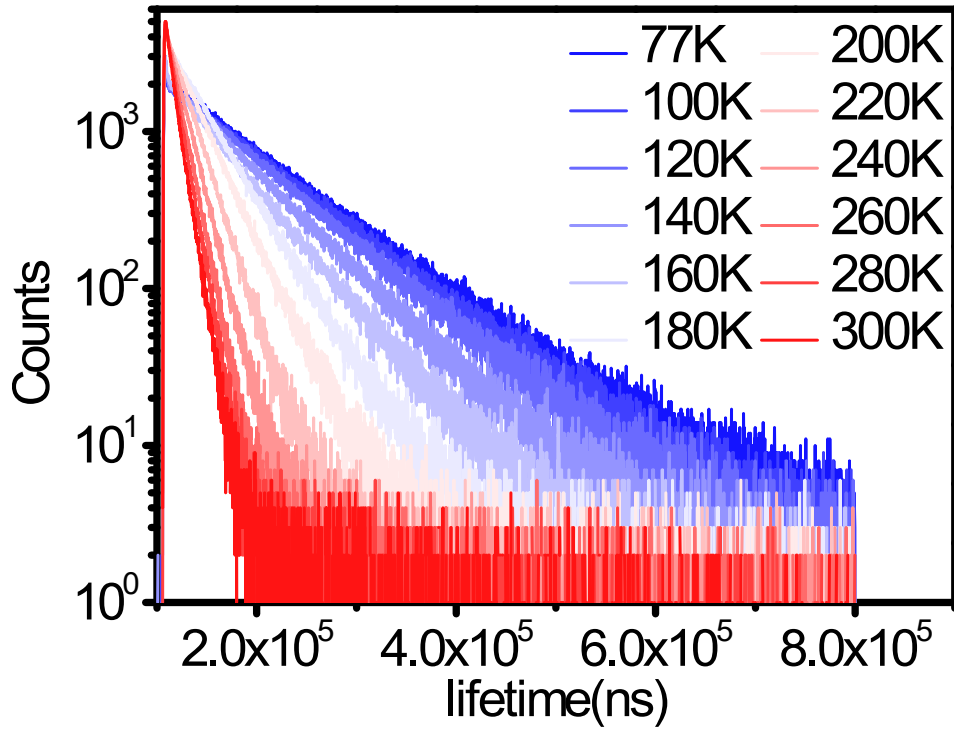

**Figure S4.** Emission decay time curves of  $\text{Cu}_n\text{I}_n(\text{PNP})_{n/2}$  monitored at 546 nm under excited at 375 nm at various temperature ranging from 77-300 K.

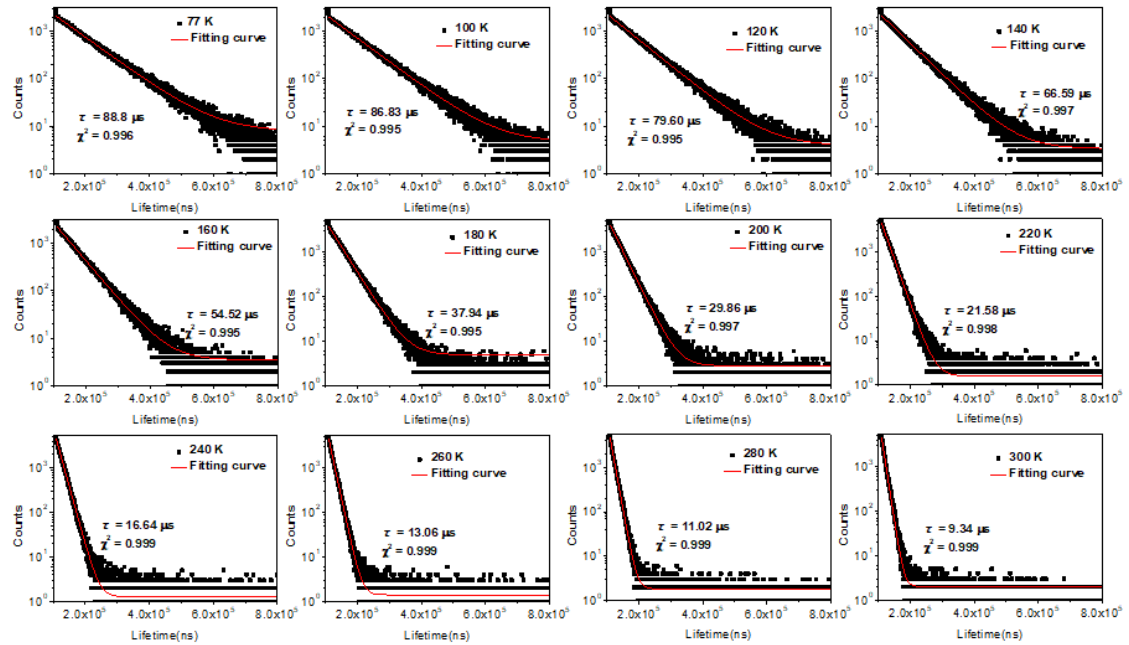

**Figure S5.** Emission decay time curves of  $\text{Cu}_n\text{I}_n(\text{PNP})_{n/2}$  monitoring at 546 nm under excited at 375 nm at various temperature ranging from 77-300 K.

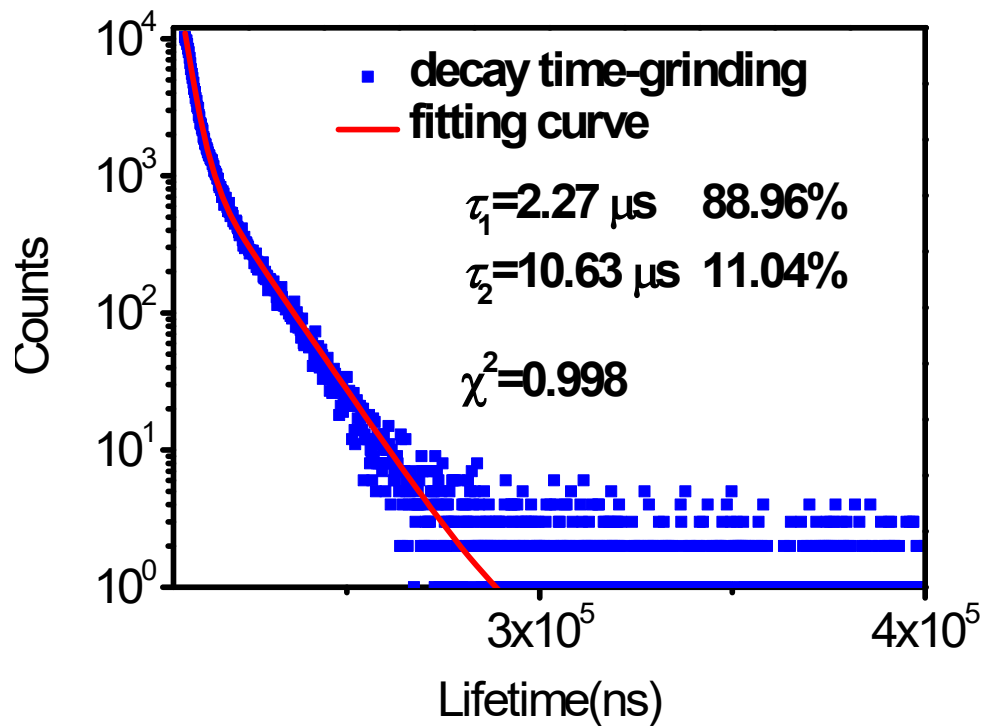

**Figure S6.** Emission decay time curve of grinding  $\text{Cu}_n\text{I}_n(\text{PNP})_{n/2}$  monitoring at 590 nm under excited at 375 nm.

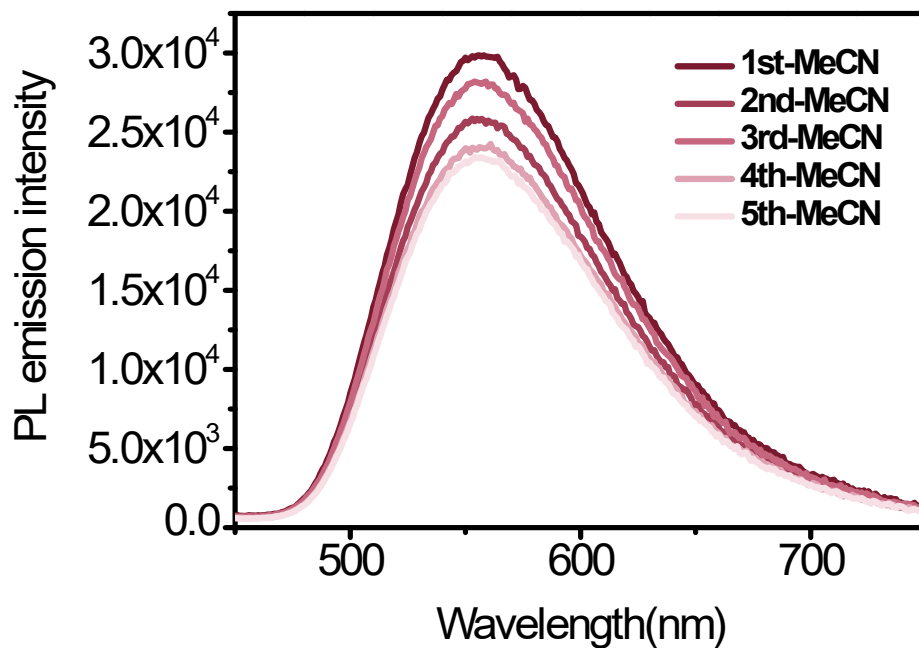

(a)

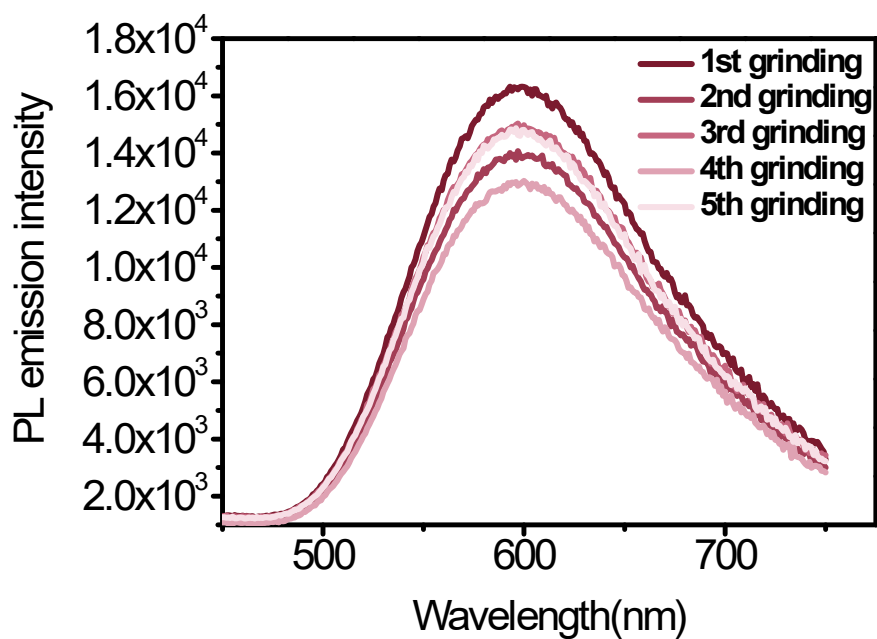

(b)

**Figure S7.** The PL emission spectra of reversible process involving (a) MeCN treatment and (b) grinding after multiple cycles.

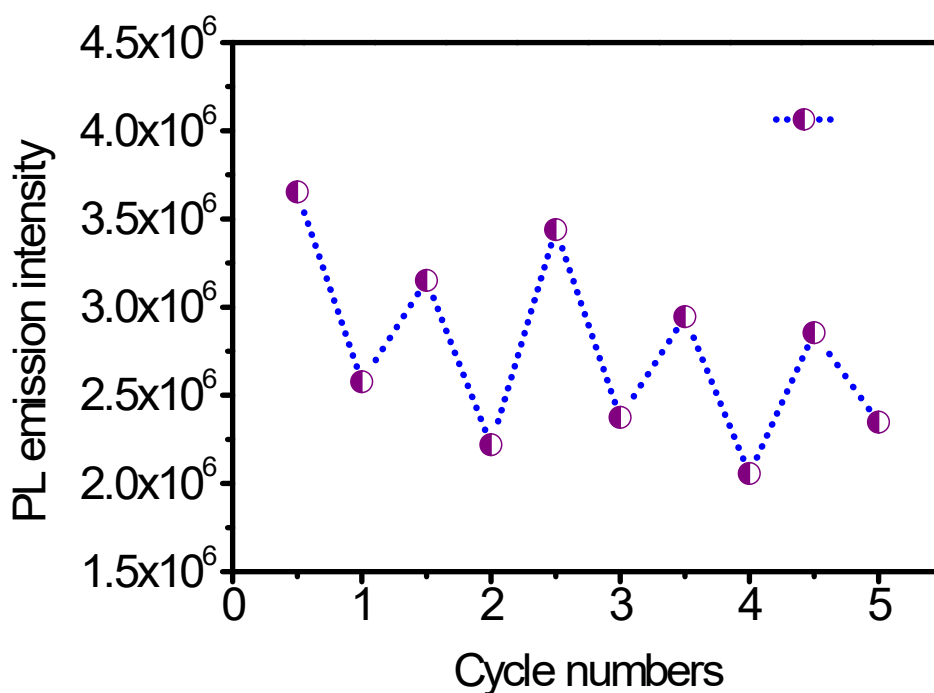

**Figure S8.** The PL emission intensity of reversible process involving (a) MeCN treatment and (b) grinding after multiple cycles.

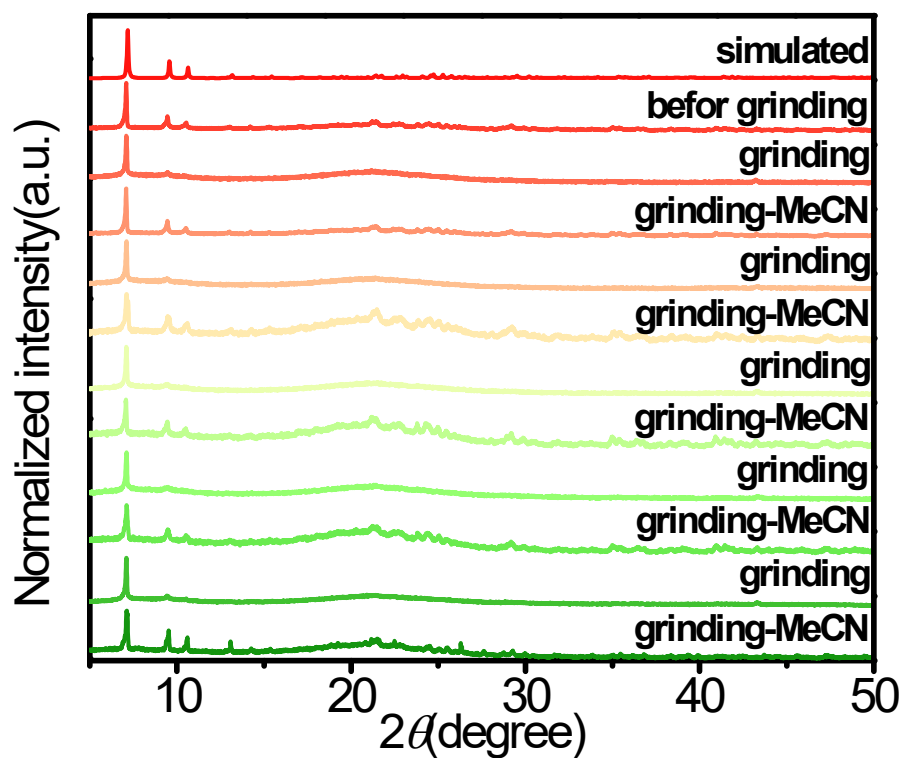

**Figure S9.** The PXRD patterns of reversible process involving (a) MeCN treatment and (b) grinding after multiple cycles.

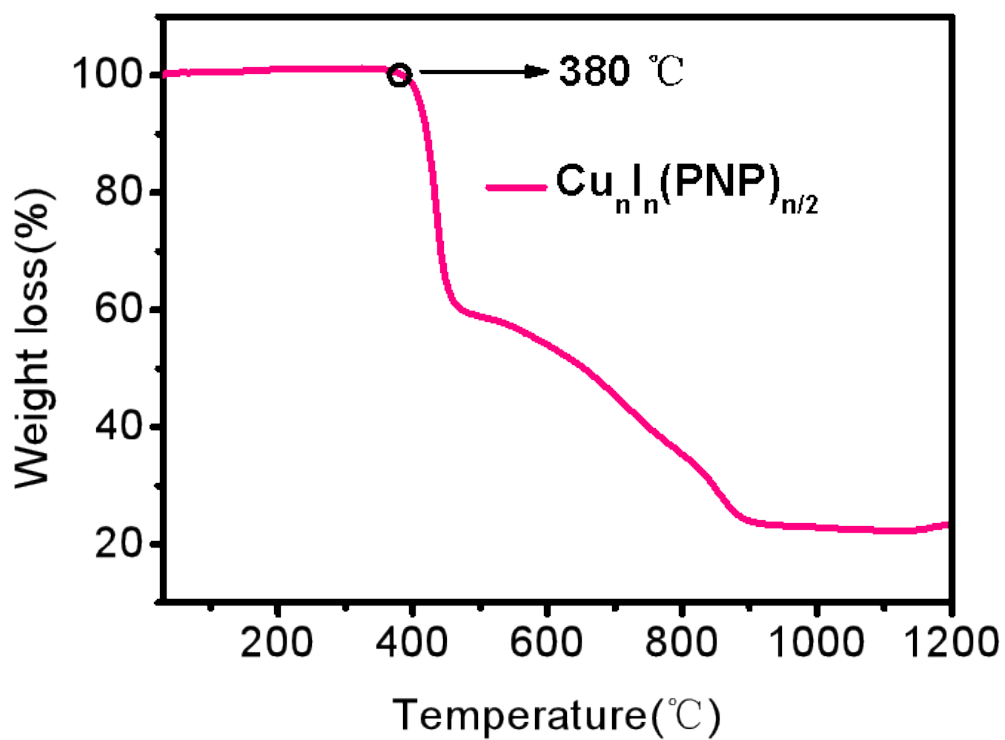

**Figure S10.** TGA curve of  $\text{Cu}_n\text{I}_n(\text{PNP})_{n/2}$  in the range of 30-1200°C.

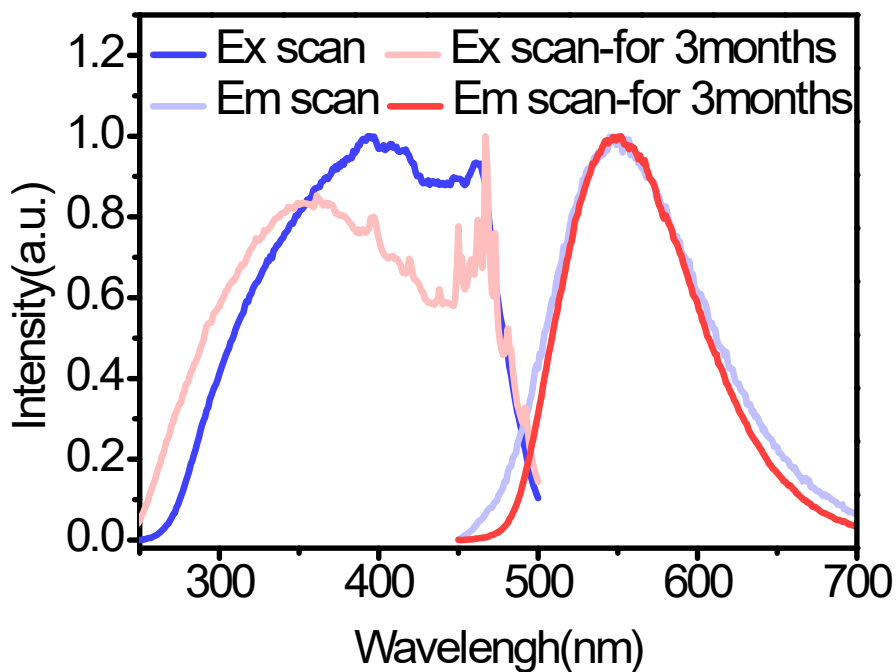

**Figure S11.** PL and PLE spectra of original  $\text{Cu}_n\text{I}_n(\text{PNP})_{n/2}$  and corresponding one exposed in air condition for 3 months.

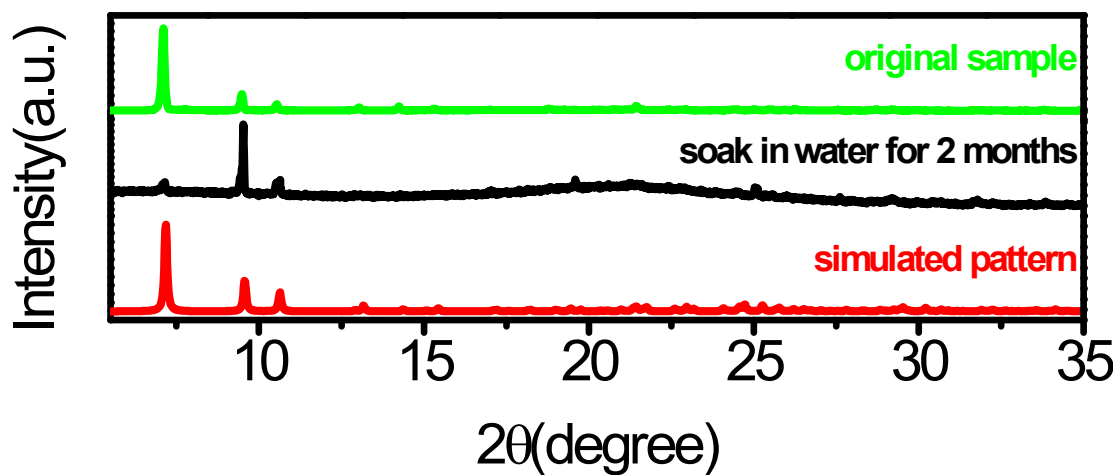

**Figure S12.** PXRD patterns of original  $\text{Cu}_n\text{I}_n(\text{PNP})_{n/2}$  and corresponding sample soaked in water for 2 months.



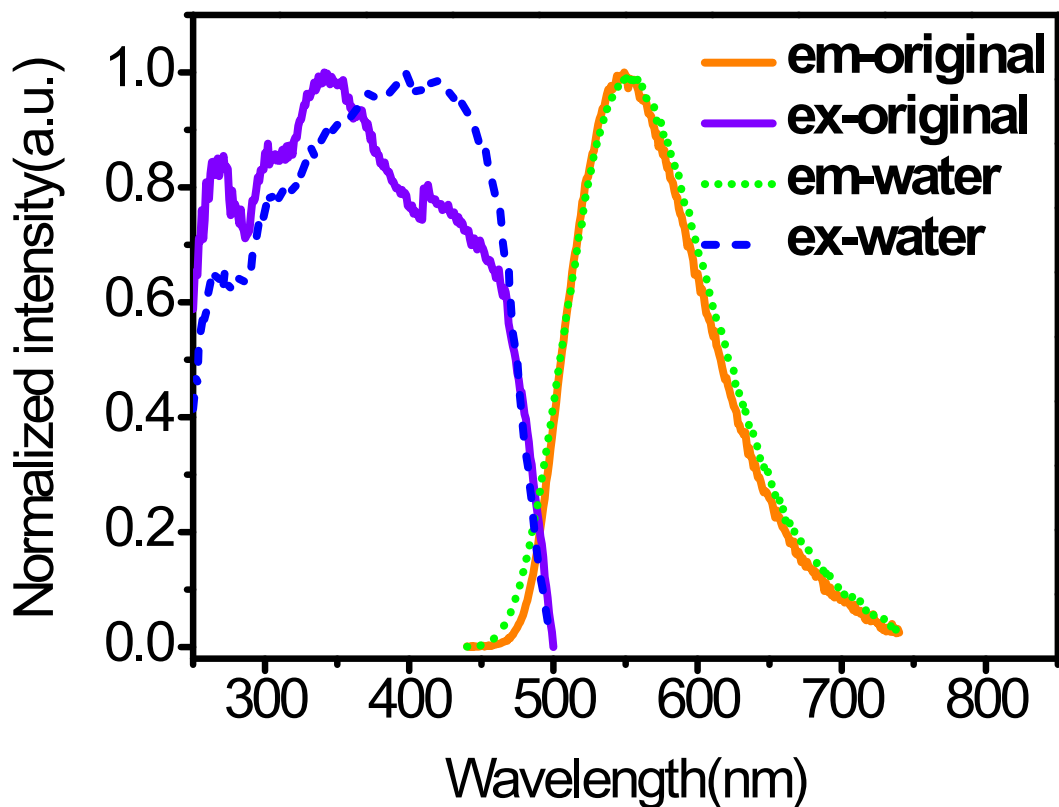

Figure S13. PL and PLE spectra of original  $\text{Cu}_n\text{I}_n(\text{PNP})_{n/2}$  and corresponding sample soaked in water for 2 months.

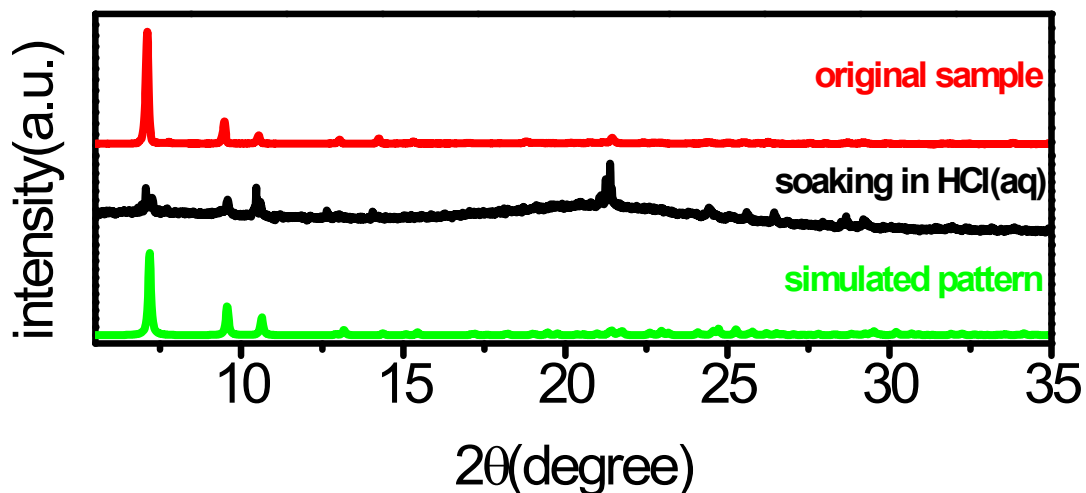

Figure S14. PXRD patterns of original  $\text{Cu}_n\text{I}_n(\text{PNP})_{n/2}$  and corresponding sample soaked in hydrochloric acid for 6 hours.

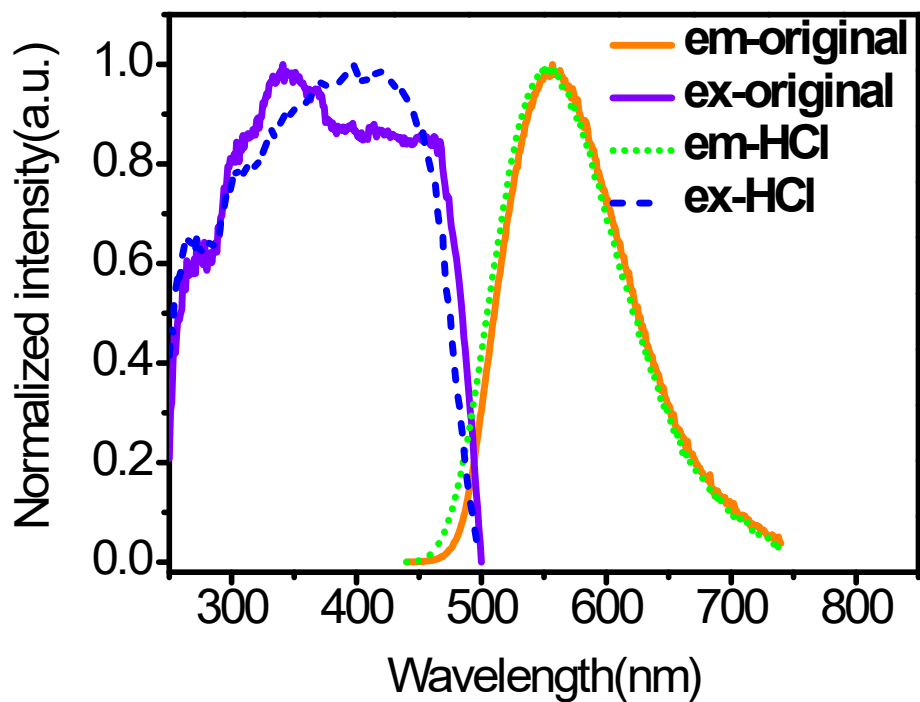

**Figure S15.** PL and PLE spectra of original  $\text{Cu}_n\text{I}_n(\text{PNP})_{n/2}$  and corresponding sample soaked in hydrochloric acid for 6 hours.

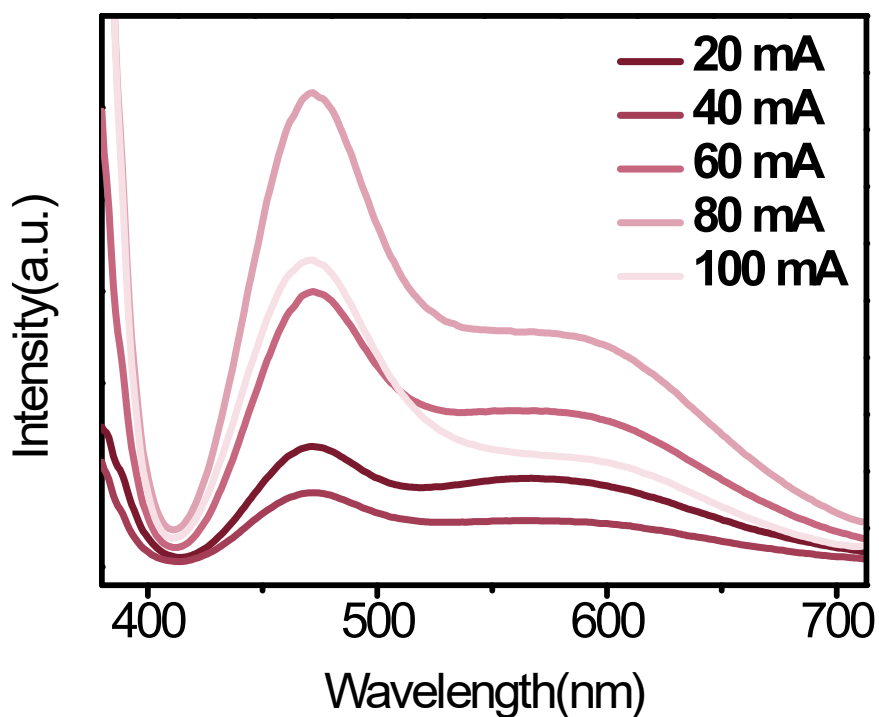

**Figure S16.** The spectrum under different current density (20-100 mA).

**Table S1.** Single X-Ray Diffraction Crystallographic Data of  $\text{Cu}_n\text{I}_n(\text{PNP})_{n/2}$ .

| Compounds                                          | $\text{Cu}_n\text{I}_n(\text{PNP})_{n/2}$                    |
|----------------------------------------------------|--------------------------------------------------------------|
| Moiety formula                                     | $\text{C}_{29}\text{H}_{23}\text{Cu}_2\text{I}_2\text{NP}_2$ |
| Formula weight / $\text{g}\cdot\text{mol}^{-1}$    | 828.32                                                       |
| Temperature / K                                    | 298                                                          |
| Crystal system                                     | Monoclinic                                                   |
| Space group                                        | $P2_1/n$                                                     |
| $a / \text{\AA}$                                   | 14.021(3)                                                    |
| $b / \text{\AA}$                                   | 12.077(2)                                                    |
| $c / \text{\AA}$                                   | 17.349(4)                                                    |
| $\alpha / \text{deg}$                              | 90                                                           |
| $\beta / \text{deg}$                               | 106.63(3)                                                    |
| $\gamma / \text{deg}$                              | 90                                                           |
| volume / $\text{\AA}^3$                            | 2814.9(10)                                                   |
| $Z$                                                | 4                                                            |
| $\rho_{\text{calc}} / \text{g}\cdot\text{cm}^{-3}$ | 1.955                                                        |
| $F(000)$                                           | 1592.0                                                       |
| Crystal size / $\text{mm}^3$                       | $0.16 \times 0.18 \times 0.37$                               |
| $\mu / \text{mm}^{-1}$                             | 3.838                                                        |
| Radiation                                          | Mo $K\alpha$ ( $\lambda = 0.71073 \text{\AA}$ )              |
| Final $R$ indexes [all data]                       | $R_1^{\text{a}}=0.0484$ $wR_2^{\text{b}}=0.1202$             |
| GOF                                                | 1.030                                                        |

$$(a) R_1 = \frac{\sum |F_o - F_c|}{\sum F_o}$$

$$(b) wR_2 = \frac{\sum [w(F_o^2 - F_c^2)^2]}{\sum [w(F_o^2)^2]}$$

**Table S2.** Selected bond angle (°) of  $\text{Cu}_n\text{I}_n(\text{PNP})_{n/2}$ .

|           | <b>Atom1</b> | <b>Atom2</b> | <b>Atom3</b> | <b>Bond angle</b> |
|-----------|--------------|--------------|--------------|-------------------|
| <b>1</b>  | I1           | Cu1          | I2           | 95.29(3)          |
| <b>2</b>  | I1           | Cu1          | P1           | 118.61(5)         |
| <b>3</b>  | I1           | Cu1          | P2           | 101.58(5)         |
| <b>4</b>  | I2           | Cu1          | P1           | 101.33(5)         |
| <b>5</b>  | I2           | Cu1          | P2           | 120.60(5)         |
| <b>6</b>  | P1           | Cu1          | P2           | 118.12(7)         |
| <b>7</b>  | I1'          | Cu2          | I2           | 110.67(4)         |
| <b>8</b>  | I1'          | Cu2          | N1           | 122.0(2)          |
| <b>9</b>  | I2           | Cu2          | N1           | 127.4(2)          |
| <b>10</b> | Cu2          | I1           | Cu1'         | 74.40(3)          |
| <b>11</b> | Cu1          | I2           | Cu2          | 71.42(3)          |

**Table S3.** Selected bond length (Å) of  $\text{Cu}_n\text{I}_n(\text{PNP})_{n/2}$ .

|          | <b>Atom1</b> | <b>Atom2</b> | <b>Bond length</b> |
|----------|--------------|--------------|--------------------|
| <b>1</b> | Cu1          | I1           | 2.690(1)           |
| <b>2</b> | Cu1          | I2           | 2.690(1)           |
| <b>3</b> | Cu1          | P1           | 2.265(2)           |
| <b>4</b> | Cu1          | P2           | 2.253(2)           |
| <b>5</b> | Cu2          | I1           | 2.547(1)           |
| <b>6</b> | Cu2          | I2           | 2.532(1)           |
| <b>7</b> | Cu2          | N1           | 1.994(5)           |
| <b>8</b> | Cu2          | Cu1          | 3.168(1)           |
| <b>9</b> | Cu1'         | Cu2          | 3.051(1)           |

**Table S4.** The emission decay time of  $\text{Cu}_n\text{I}_n(\text{PNP})_{n/2}$  at various temperature ranging from 77-300 K.

|    | Temperature/K | Lifetime/ $\mu\text{s}$ |
|----|---------------|-------------------------|
| 1  | 77            | 88.8                    |
| 2  | 100           | 86.83                   |
| 3  | 120           | 79.6                    |
| 4  | 140           | 66.6                    |
| 5  | 160           | 54.52                   |
| 6  | 180           | 37.94                   |
| 7  | 200           | 29.86                   |
| 8  | 220           | 21.58                   |
| 9  | 240           | 16.64                   |
| 10 | 260           | 13.06                   |
| 11 | 280           | 11.02                   |
| 12 | 300           | 9.34                    |

**Table S5.** Vertical excitation energies ( $S_1 \leftarrow S_0$  and  $T_1 \leftarrow S_0$ , in eV) and associated singlet-triplet energy gap ( $\Delta E_{ST}$ ) calculated with TD-DFT method.

| compound                                  | $S_1 \leftarrow S_0$ | $T_1 \leftarrow S_0$ | $\Delta E_{ST}(\text{eV})$ |
|-------------------------------------------|----------------------|----------------------|----------------------------|
| $\text{Cu}_n\text{I}_n(\text{PNP})_{n/2}$ | 0.228                | 0.108                | 0.12                       |

**Table S6.** The percentage of Phosp. and TADF in total intensity  $I_{\text{tot}} = I(S_1) + I(T_1)$  of a diversity of copper(I) complexes.

| Complex                                               | Phosp. (%) + TADF (%) | Ref.      |
|-------------------------------------------------------|-----------------------|-----------|
| $\text{Cu}_n\text{I}_n(\text{PNP})_{n/2}$             | 11+89                 | This work |
| 1                                                     | 32+68                 | 1         |
| 2                                                     | 41+59                 | 1         |
| 3                                                     | 33+67                 | 1         |
| (PNNP) $\text{Cu}_2\text{I}_2$                        | 25+75                 | 2         |
| $[\text{Cu}(\text{czpzpy})(\text{PPh}_3)]\text{BF}_4$ | 24+76                 | 3         |

---

**References**

- [1]. G. Farias, C. A. M. Salla, J. Toigo, L. Duarte, A. J. Bortoluzzi, E. Giroto, H. Gallardo, T. D. Z. Atvars, B. de Souza and I. H. Bechtold, *Dalton Trans.*, 2022, **51**, 1008-1018.
- [2]. J. H. Jia, X. L. Chen, J. Z. Liao, D. Liang, M. X. Yang, R. Yu and C. Z. Lu, *Dalton Trans.*, 2019, **48**, 1418-1426.
- [3]. X.-L. Chen, C.-S. Lin, X.-Y. Wu, R. Yu, T. Teng, Q.-K. Zhang, Q. Zhang, W.-B. Yang and C.-Z. Lu, *J. Mater. Chem. C*, 2015, **3**, 1187-1195.
- [4]. X. L. Chen, R. Yu, X. Y. Wu, D. Liang, J. H. Jia and C. Z. Lu, *Chem. Commun.*, 2016, **52**, 6288-6291.
